# Supplementary material for: Changes in Smoking Behavior over Family Transitions: Evidence for Anticipation and Adaptation Effects
Source: Int J Environ Res Public Health. 2017 Jun 7;14(6):610. doi: 10.3390/ijerph14060610 (PMC5486296; doi:10.3390/ijerph14060610)
Supplement: Supplementary file 1 [file ijerph-14-00610-s001.pdf]

# Supplementary materials: Changes in Smoking Behaviour over Family Transitions: Evidence for Anticipation and Adaptation Effects

Damien Bricard, Stéphane Legleye and Myriam Khlat

**Table S1.** Distributions of age at smoking initiation and cessation and at family events

|                       | Men         |          |            | Women       |          |            |
|-----------------------|-------------|----------|------------|-------------|----------|------------|
|                       | % concerned | Mean age | Median age | % concerned | Mean age | Median age |
| Initiation            | 46.9        | 18.6     | 18         | 30.0        | 18.9     | 18         |
| Cessation             | 21.5        | 41.3     | 40         | 10.7        | 36.8     | 35         |
| Living with a partner | 91.4        | 25.4     | 24         | 93.4        | 23.7     | 22         |
| First childbirth      | 80.4        | 27.2     | 27         | 84.7        | 25.1     | 25         |
| Separation            | 20.9        | 34.4     | 33         | 32.0        | 34.4     | 34         |

**Table S2.** Descriptive statistics

| Variables                                         | Men (N=4989) | Women (N=5812) |
|---------------------------------------------------|--------------|----------------|
| <b>Individual fixed characteristics</b>           |              |                |
| Initial smoking status at 17                      | 22.8%        | 14.8%          |
| <b>Years of birth</b>                             |              |                |
| before 1941                                       | 13.7%        | 12.2%          |
| 1941-1950                                         | 22.1%        | 20.0%          |
| 1951-1960                                         | 24.5%        | 26.0%          |
| 1961-1970                                         | 23.2%        | 23.6%          |
| after 1970                                        | 16.6%        | 18.1%          |
| <b>Born abroad</b>                                | 11.1%        | 9.8%           |
| <b>Living in rural municipality</b>               | 29.1%        | 26.8%          |
| <b>Number of life events during childhood</b>     | 2.06         | 2.37           |
| <b>Educational level</b>                          |              |                |
| Primary or no education                           | 27.8%        | 27.8%          |
| Lower or upper secondary                          | 49.7%        | 44.0%          |
| 1 or 2 years higher education                     | 9.0%         | 11.6%          |
| 3 or more years higher education                  | 13.5%        | 16.6%          |
| <b>Social class (last job)</b>                    |              |                |
| Manager                                           | 4.4%         | 2.5%           |
| Farmer                                            | 7.5%         | 4.1%           |
| Craftmen                                          | 12.5%        | 9.2%           |
| Associate professional                            | 19.6%        | 20.9%          |
| Office workers                                    | 15.2%        | 51.0%          |
| Elementary jobs                                   | 40.9%        | 12.3%          |
| <b>Individual means of time-varying variables</b> |              |                |
| Log of cigarette prices                           | 4.66         | 4.67           |
| <b>Occupation</b>                                 |              |                |
| Long-term contract                                | 69.0%        | 52.8%          |
| Short-term contract                               | 14.8%        | 14.7%          |
| Unemployment                                      | 1.5%         | 2.5%           |
| Inactivity                                        | 2.5%         | 16.4%          |
| Schooling                                         | 12.2%        | 13.5%          |
| <b>Family status</b>                              |              |                |
| In a couple                                       | 61.9%        | 66.5%          |
| With kids                                         | 50.6%        | 58.2%          |

Separated

3.7%

6.5%

**Table S3.** Discrete-time logistic regression of smoking initiation – Men and Women (Odds-ratio)

| Variables                                                                       | O.R   | Men<br>S.E. |     | O.R.   | Women<br>S.E. |     |
|---------------------------------------------------------------------------------|-------|-------------|-----|--------|---------------|-----|
| <b>Years of birth (ref: before 1941):</b>                                       |       |             |     |        |               |     |
| 1941-1950                                                                       | 1.19  | (0.14)      |     | 1.60   | (0.24)        | *** |
| 1951-1960                                                                       | 1.28  | (0.18)      | *   | 2.12   | (0.35)        | *** |
| 1961-1970                                                                       | 1.44  | (0.24)      | **  | 2.48   | (0.48)        | *** |
| after 1970                                                                      | 1.52  | (0.33)      | *   | 2.08   | (0.52)        | *** |
| <b>Born abroad</b>                                                              | 0.96  | (0.08)      |     | 0.81   | (0.09)        | **  |
| <b>Living in rural municipality</b>                                             | 1.05  | (0.07)      |     | 0.77   | (0.06)        | *** |
| <b>Number of life events during childhood</b>                                   | 1.02  | (0.01)      |     | 1.03   | (0.01)        | **  |
| <b>Educational level (ref: primary or no education):</b>                        |       |             |     |        |               |     |
| Lower and upper secondary                                                       | 1.19  | (0.09)      | **  | 1.50   | (0.15)        | *** |
| 1 or 2 years higher education                                                   | 0.89  | (0.13)      |     | 1.17   | (0.18)        |     |
| 3 or more years higher education                                                | 0.97  | (0.15)      |     | 1.24   | (0.21)        |     |
| <b>Social class from last job (ref: manager):</b>                               |       |             |     |        |               |     |
| Farmer                                                                          | 0.75  | (0.14)      |     | 0.64   | (0.20)        |     |
| Craftmen                                                                        | 1.06  | (0.15)      |     | 0.95   | (0.19)        |     |
| Associate professional                                                          | 1.06  | (0.12)      |     | 1.04   | (0.13)        |     |
| Office workers                                                                  | 1.01  | (0.12)      |     | 0.89   | (0.12)        |     |
| Elementary jobs                                                                 | 1.15  | (0.13)      |     | 0.93   | (0.15)        |     |
| <b>Time-varying variables :</b>                                                 |       |             |     |        |               |     |
| age                                                                             | 0.62  | (0.03)      | *** | 0.71   | (0.03)        | *** |
| age squared                                                                     | 1.01  | (0.00)      | *** | 1.00   | (0.00)        | *** |
| log of cigarette prices                                                         | 0.60  | (0.12)      | *** | 0.29   | (0.06)        | *** |
| <b>Occupation (ref: long-term contract):</b>                                    |       |             |     |        |               |     |
| short-term contract                                                             | 1.11  | (0.10)      |     | 1.24   | (0.14)        | *   |
| unemployment                                                                    | 0.81  | (0.35)      |     | 0.75   | (0.26)        |     |
| inactivity                                                                      | 1.30  | (0.19)      | *   | 1.12   | (0.16)        |     |
| schooling                                                                       | 1.14  | (0.12)      |     | 1.48   | (0.18)        | *** |
| <b>Leads and lags Couple (ref: Couple (&lt;t-3) or no):</b>                     |       |             |     |        |               |     |
| Couple (t-3)                                                                    | 1.11  | (0.12)      |     | 1.14   | (0.14)        |     |
| Couple (t-2)                                                                    | 1.19  | (0.14)      |     | 1.30   | (0.16)        | **  |
| Couple (t-1)                                                                    | 0.95  | (0.14)      |     | 1.08   | (0.16)        |     |
| Couple (t)                                                                      | 1.00  | (0.17)      |     | 1.07   | (0.18)        |     |
| Couple (t+1)                                                                    | 0.71  | (0.16)      |     | 0.89   | (0.18)        |     |
| Couple (t+2)                                                                    | 0.57  | (0.16)      | **  | 0.47   | (0.12)        | *** |
| Couple (t+3)                                                                    | 0.48  | (0.10)      | *** | 0.36   | (0.08)        | *** |
| <b>Leads and lags First childbirth (ref: First childbirth (&lt;t-3) or no):</b> |       |             |     |        |               |     |
| First childbirth (t-3)                                                          | 1.15  | (0.16)      |     | 0.80   | (0.13)        |     |
| First childbirth (t-2)                                                          | 1.05  | (0.18)      |     | 0.85   | (0.15)        |     |
| First childbirth (t-1)                                                          | 1.05  | (0.22)      |     | 0.64   | (0.15)        | *   |
| First childbirth (t)                                                            | 1.10  | (0.27)      |     | 1.10   | (0.25)        |     |
| First childbirth (t+1)                                                          | 0.97  | (0.31)      |     | 0.92   | (0.26)        |     |
| First childbirth (t+2)                                                          | 0.70  | (0.29)      |     | 0.86   | (0.31)        |     |
| First childbirth (t+3)                                                          | 1.46  | (0.33)      | *   | 2.24   | (0.47)        | *** |
| <b>Leads and lags Separation (ref: Separation (&lt;t-3) or no):</b>             |       |             |     |        |               |     |
| Separation (t-3)                                                                | 1.09  | (0.51)      |     | 0.95   | (0.38)        |     |
| Separation (t-2)                                                                | 1.58  | (0.74)      |     | 2.49   | (0.72)        | *** |
| Separation (t-1)                                                                | 1.84  | (0.98)      |     | 4.08   | (1.19)        | *** |
| Separation (t)                                                                  | 2.32  | (0.97)      | **  | 0.90   | (0.39)        |     |
| Separation (t+1)                                                                | 0.95  | (0.69)      |     | 1.35   | (0.54)        |     |
| Separation (t+2)                                                                | 1.32  | (0.95)      |     | 0.22   | (0.23)        |     |
| Separation (t+3)                                                                | 1.24  | (0.58)      |     | 0.22   | (0.12)        | *** |
| <b>Individual means of time-varying variables:</b>                              |       |             |     |        |               |     |
| Log cigarette prices                                                            | 15.81 | (19.63)     | **  | 121.53 | (156.48)      | *** |
| <b>Occupation (ref: long-term contract):</b>                                    |       |             |     |        |               |     |
| short-term contract                                                             | 1.89  | (0.41)      | *** | 2.68   | (0.60)        | *** |
| unemployment                                                                    | 3.04  | (1.84)      | *   | 3.42   | (1.77)        | **  |
| inactivity                                                                      | 1.77  | (0.74)      |     | 1.21   | (0.25)        |     |

|                        |       |        |     |        |        |     |
|------------------------|-------|--------|-----|--------|--------|-----|
| schooling              | 0.80  | (0.42) |     | 0.55   | (0.32) |     |
| <b>Family status :</b> |       |        |     |        |        |     |
| Couple                 | 3.26  | (0.85) | *** | 1.94   | (0.65) | **  |
| With kids              | 0.65  | (0.12) | **  | 0.76   | (0.18) |     |
| Separated              | 4.49  | (1.52) | *** | 4.84   | (1.81) | *** |
| N                      | 4119  |        |     | 5168   |        |     |
| N*T                    | 78972 |        |     | 117348 |        |     |
| Pseudo R <sup>2</sup>  | 0.18  |        |     | 0.17   |        |     |

Notes: Significance levels: \*\*\* 1%, \*\* 5%, \* 10%

**Table S4.** Discrete-time logistic regression of smoking cessation – Men and Women (Odds-ratio)

| Variables                                                                       | Men  |        |     | Women |        |     |
|---------------------------------------------------------------------------------|------|--------|-----|-------|--------|-----|
|                                                                                 | O.R. | S.E.   |     | O.R.  | S.E.   |     |
| <b>Age at smoking initiation</b>                                                | 0.96 | (0.01) | *** | 0.96  | (0.01) | **  |
| <b>Years of birth (ref: before 1941):</b>                                       |      |        |     |       |        |     |
| 1941-1950                                                                       | 0.77 | (0.12) | *   | 0.79  | (0.22) |     |
| 1951-1960                                                                       | 0.73 | (0.15) |     | 0.57  | (0.16) | **  |
| 1961-1970                                                                       | 1.25 | (0.31) |     | 0.95  | (0.32) |     |
| after 1970                                                                      | 1.92 | (0.67) | *   | 0.97  | (0.40) |     |
| <b>Born abroad</b>                                                              | 0.88 | (0.12) |     | 1.27  | (0.23) |     |
| <b>Living in rural municipality</b>                                             | 0.93 | (0.08) |     | 1.09  | (0.13) |     |
| <b>Number of life events during childhood</b>                                   | 1.01 | (0.02) |     | 1.02  | (0.02) |     |
| <b>Educational level (ref: primary or no education):</b>                        |      |        |     |       |        |     |
| Lower and upper secondary                                                       | 1.30 | (0.13) | *** | 1.07  | (0.18) |     |
| 1 or 2 years higher education                                                   | 1.29 | (0.27) |     | 1.06  | (0.26) |     |
| 3 or more years higher education                                                | 1.00 | (0.22) |     | 1.98  | (0.51) | *** |
| <b>Social class from last job (ref: manager):</b>                               |      |        |     |       |        |     |
| Farmer                                                                          | 0.76 | (0.21) |     | 0.65  | (0.40) |     |
| Craftmen                                                                        | 0.68 | (0.14) | *   | 1.02  | (0.30) |     |
| Associate professional                                                          | 0.76 | (0.12) | *   | 1.06  | (0.20) |     |
| Office workers                                                                  | 0.87 | (0.15) |     | 0.88  | (0.19) |     |
| Elementary jobs                                                                 | 0.81 | (0.13) |     | 0.68  | (0.19) |     |
| <b>Time-varying variables:</b>                                                  |      |        |     |       |        |     |
| age                                                                             | 1.25 | (0.08) | *** | 1.28  | (0.10) | *** |
| age squared                                                                     | 1.00 | (0.00) | **  | 1.00  | (0.00) | **  |
| Log of cigarette prices                                                         | 0.91 | (0.17) |     | 2.26  | (0.65) | *** |
| <b>Occupation (ref: long-term contract):</b>                                    |      |        |     |       |        |     |
| short-term contract                                                             | 0.93 | (0.17) |     | 1.00  | (0.19) |     |
| unemployment                                                                    | 0.83 | (0.26) |     | 1.32  | (0.41) |     |
| inactivity                                                                      | 0.56 | (0.25) |     | 1.04  | (0.24) |     |
| schooling                                                                       | 0.62 | (0.23) |     | 0.35  | (0.13) | *** |
| <b>Leads and lags Couple (ref: Couple (&lt;t-3) or no):</b>                     |      |        |     |       |        |     |
| Couple (t-3)                                                                    | 1.08 | (0.42) |     | 1.87  | (0.77) |     |
| Couple (t-2)                                                                    | 0.96 | (0.35) |     | 1.12  | (0.49) |     |
| Couple (t-1)                                                                    | 1.32 | (0.42) |     | 1.40  | (0.46) |     |
| Couple (t)                                                                      | 2.01 | (0.61) | **  | 2.45  | (0.84) | *** |
| Couple (t+1)                                                                    | 1.51 | (0.51) |     | 1.12  | (0.43) |     |
| Couple (t+2)                                                                    | 1.86 | (0.60) | *   | 1.14  | (0.43) |     |
| Couple (t+3)                                                                    | 1.73 | (0.50) | *   | 0.87  | (0.33) |     |
| <b>Leads and lags First childbirth (ref: First childbirth (&lt;t-3) or no):</b> |      |        |     |       |        |     |
| First childbirth (t-3)                                                          | 1.15 | (0.38) |     | 1.45  | (0.52) |     |
| First childbirth (t-2)                                                          | 1.40 | (0.41) |     | 2.72  | (0.78) | *** |
| First childbirth (t-1)                                                          | 1.24 | (0.38) |     | 3.81  | (1.12) | *** |
| First childbirth (t)                                                            | 1.78 | (0.50) | **  | 3.39  | (1.04) | *** |
| First childbirth (t+1)                                                          | 1.51 | (0.44) |     | 0.74  | (0.36) |     |
| First childbirth (t+2)                                                          | 1.25 | (0.39) |     | 0.88  | (0.40) |     |
| First childbirth (t+3)                                                          | 1.13 | (0.30) |     | 0.99  | (0.36) |     |
| <b>Leads and lags Separation (ref: Separation (&lt;t-3) or no):</b>             |      |        |     |       |        |     |
| Separation (t-3)                                                                | 0.46 | (0.27) |     | 0.69  | (0.32) |     |
| Separation (t-2)                                                                | 0.33 | (0.24) |     | 0.76  | (0.35) |     |
| Separation (t-1)                                                                | 0.73 | (0.37) |     | 1.33  | (0.57) |     |
| Separation (t)                                                                  | 1.63 | (0.86) |     | 0.73  | (0.41) |     |

|                                                    |       |        |     |       |          |     |
|----------------------------------------------------|-------|--------|-----|-------|----------|-----|
| Separation (t+1)                                   | 1.80  | (1.01) |     | 0.72  | (0.45)   |     |
| Separation (t+2)                                   | 1.68  | (1.07) |     | 0.95  | (0.66)   |     |
| Separation (t+3)                                   | 4.30  | (1.62) | *** | 1.79  | (0.75)   |     |
| <b>Individual means of time-varying variables:</b> |       |        |     |       |          |     |
| Log cigarette prices                               | 1.32  | (2.86) |     | 94.45 | (189.12) | **  |
| <b>Occupation (ref: long-term contract):</b>       |       |        |     |       |          |     |
| short-term contract                                | 0.49  | (0.18) | *   | 0.63  | (0.30)   |     |
| unemployment                                       | 0.35  | (0.38) |     | 0.15  | (0.17)   | *   |
| inactivity                                         | 1.32  | (0.88) |     | 0.48  | (0.22)   |     |
| schooling                                          | 2.83  | (2.30) |     | 0.62  | (0.59)   |     |
| <b>Family status :</b>                             |       |        |     |       |          |     |
| Couple                                             | 0.87  | (0.45) |     | 1.50  | (0.84)   |     |
| With kids                                          | 0.50  | (0.22) |     | 0.95  | (0.53)   |     |
| Separated                                          | 0.04  | (0.03) | *** | 0.08  | (0.07)   | *** |
| N                                                  | 2333  |        |     | 1734  |          |     |
| N*T                                                | 49977 |        |     | 33422 |          |     |
| Pseudo R <sup>2</sup>                              | 0.08  |        |     | 0.09  |          |     |

Notes: Significance levels: \*\*\* 1%, \*\* 5%, \* 10%

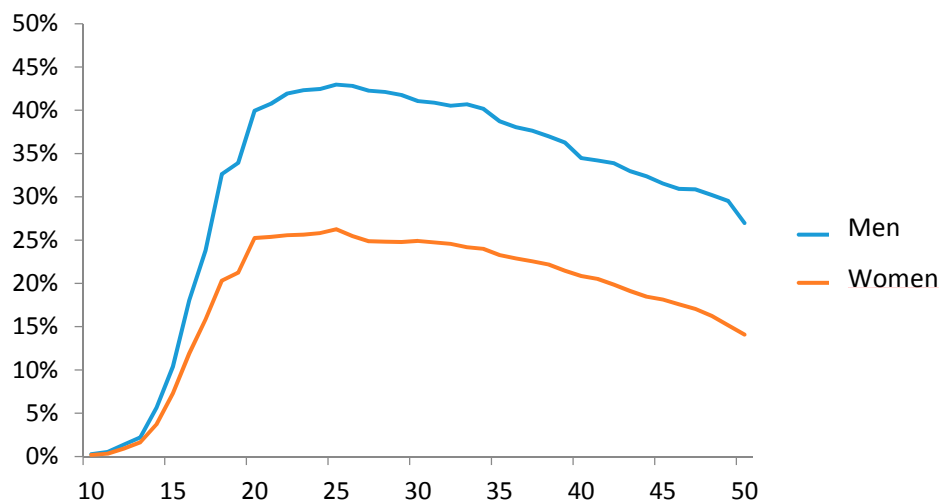

Figure S1. Prevalence of smoking over ages

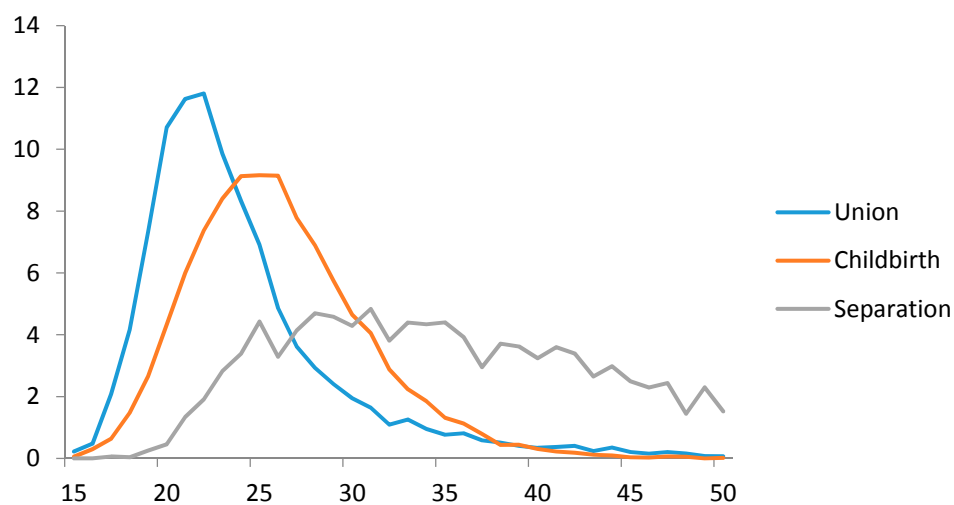

Figure S2. Distribution of family events over ages
